## RESEARCH ARTICLE

# Dietary eating patterns, dairy consumption, and anxiety: A systematic literature review

Naimisha Movva <sup>\*</sup>, Heidi Reichert, Naushin Hooda, Lauren C. Bylsma , Meghan Mitchell, Sarah S. Cohen

EpidStrategies, A Division of ToxStrategies, LLC, Katy, Texas, United States of America

\* [nmovva@epidstrategies.com](mailto:nmovva@epidstrategies.com)

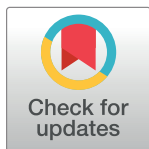

## Abstract

### Background

Nutrition affects both physical and mental health but evidence is mixed regarding potential associations between anxiety and diet, particularly dairy consumption. We conducted a systematic literature review (SLR) of dairy consumption and/or various dietary patterns and risk of anxiety.

### Methods

Literature searches were conducted in PubMed and Embase. All study designs except case reports, small case series, and SLRs were considered for inclusion. Reference lists of previously published SLRs were reviewed for any relevant additional studies. Studies of populations without dairy sensitivities exploring the association between dietary patterns and/or dairy consumption and anxiety published through May 2022 were identified using predefined eligibility criteria. Study quality was determined using the Academy of Nutrition and Dietetics Quality Criteria Checklist.

### Results

For this SLR, 132 studies were included; 80 were cross-sectional. Studies examined different dietary patterns (e.g., Mediterranean, gluten-free) and anxiety using various anxiety scales, with 19 studies specifically reporting on whole dairy consumption and anxiety. Dairy consumption was significantly associated with a lower risk of anxiety in 7 studies, while the remaining 12 studies showed no significant associations. Evidence was mixed for the association between various dietary patterns and anxiety, but more studies observed a lower risk of anxiety with greater adherence to “healthy” diets (e.g., Mediterranean, diet quality score, vegetarian/vegan) than a higher risk. Notable heterogeneity in study populations, time periods, geographical locations, dietary assessment methods, and anxiety scales was observed.

### Conclusions

The results of this SLR suggest a potential link between diet including dairy consumption and anxiety, but future studies, especially with longitudinal designs that measure diet and

## OPEN ACCESS

**Citation:** Movva N, Reichert H, Hooda N, Bylsma LC, Mitchell M, Cohen SS (2023) Dietary eating patterns, dairy consumption, and anxiety: A systematic literature review. *PLoS ONE* 18(12): e0295975. <https://doi.org/10.1371/journal.pone.0295975>

**Editor:** Nour Amin Elshahry, University of Petra (UOP), JORDAN

**Received:** August 8, 2023

**Accepted:** December 2, 2023

**Published:** December 28, 2023

**Copyright:** © 2023 Movva et al. This is an open access article distributed under the terms of the [Creative Commons Attribution License](https://creativecommons.org/licenses/by/4.0/), which permits unrestricted use, distribution, and reproduction in any medium, provided the original author and source are credited.

**Data Availability Statement:** All relevant data are within the paper and its [Supporting Information](#) files.

**Funding:** This work was supported by a research grant from the National Dairy Council. The funders had no role in study design, data collection and analysis, or preparation of the manuscript.

**Competing interests:** The authors have declared that no competing interests exist.

anxiety at several timepoints and comprehensively adjust for confounders, are needed to fully understand the relationship between diet and anxiety.

## Introduction

Anxiety disorders affect up to one-third of the population based on large population-based survey across the United States (US) and Europe [1]. Nutrition is one of many factors that may affect an individual's mental health. In a recently published scoping review of diet and anxiety, greater consumption of certain healthier foods such as fruits and vegetables, omega-3 fatty acids, and "healthy" dietary patterns resulted in less anxiety, while other factors (such as a high-fat diet and high intake of sugars) were associated with more anxiety [2]. Dairy consumption was not specifically addressed in this scoping review, but dairy consumption is an integral part of a healthy dietary pattern which represents everything individuals habitually eat and drink and the ways in which these elements act together to impact health [3]. For adults, the 2020–2025 US Department of Agriculture Dietary Guidelines for Americans recommend an equivalency of 3 cups of dairy per day [3].

A systematic review of dairy consumption and depression conducted through December 2018 reported mixed findings that depended on the gender, population, or dairy type across the 13 included studies; the authors further reported that no studies specifically related to dairy consumption and anxiety, as a secondary outcome, were identified [4]. However, observational studies describing the association between dairy consumption and anxiety have recently been identified and report inconsistent findings [5–7].

Given the high prevalence of anxiety and the potential for diet to be a modifiable risk factor for this important aspect of mental health, the purpose of this systematic literature review (SLR) is to summarize the published literature on associations between dietary patterns or eating habits and anxiety. This review also identified any publications specifically related to the consumption of whole dairy products and the risk of anxiety.

## Methods

A study protocol was developed and registered on PROSPERO (CRD42022333785) ([www.crd.york.ac.uk/PROSPERO](http://www.crd.york.ac.uk/PROSPERO)) prior to the start of the SLR. The Preferred Reporting Items for Systematic Reviews and Meta-analyses (PRISMA) [8] guidelines were followed in all aspects of the preparation, conduct, and reporting of this SLR.

## Eligibility criteria

Pre-defined study population, intervention, comparator, outcomes, and study design (PICOS) criteria were utilized to identify relevant studies. Studies of persons with a dairy sensitivity were excluded; no additional specifications on population were applied. Any studies examining a dietary pattern (no restrictions on type of pattern were made) or consumption of dairy products (milk [both regular and fermented], yogurt, or cheese) were considered for inclusion. Comparators were low or no adherence to the dietary pattern or low/no dairy consumption. Studies reporting outcomes related to risk of anxiety diagnosed using a validated scale or diagnosis code were included while studies of self-reported anxiety were excluded. Studies examining risk of anxiety in relation to adherence to a specific diet were also included. Observational studies (cohort, case-control, and cross-sectional) and randomized controlled trials (RCTs) were included. Studies not published in English, case series with <20 participants, and studies

not meeting the PICOS criteria were excluded. Reference lists of relevant reviews were checked to identify any additional studies meeting the PICOS criteria that were not captured by the literature searches.

### Study identification, screening, and abstraction

Comprehensive literature searches were conducted in the PubMed and Embase databases to capture literature published through May 19, 2022. The search strategy is described in [S1 Table](#). Study de-duplication, article screening, and data abstraction were conducted using DistillerSR software [9], which allows for the SLR management process to be transparent and auditable. Using the PICOS criteria, one reviewer screened the titles and abstracts of the identified studies. If an abstract was deemed relevant, the full text was examined by 2 independent reviewers. Data were abstracted from the studies included at the full-text level. Abstraction elements included study characteristics such as time period and location, population characteristics such as age and health status, exposure including type of dietary pattern and/or dairy consumption, and reported outcomes of anxiety including method of diagnosis. After abstraction was completed by one reviewer, another reviewer independently checked all of the data elements for accuracy; conflicts were resolved by a senior reviewer.

### Study quality

Study quality of the included studies was appraised using the Academy of Nutrition and Dietetics Quality Criteria Checklist [10], which was specifically designed for nutrition studies. This checklist collects yes, no, not available (NA), or unclear responses to 10 questions assessing various domains in which bias can arise in a study (e.g., inclusion and exclusion criteria, data collection, data analysis, and conflicts of interest). The tool was modified for this SLR as follows: first, the question regarding handling of withdrawals was deemed not relevant for cross-sectional and case-control studies; second, the question about blinding was only answered for RCTs. Based on responses to the 10 questions, a study was then given a final evaluation of positive, negative, or neutral; a study was given a positive rating if the majority of the answers were 'yes' including criteria 2,3,6, and 7; a neutral rating if the majority were yes or there were some NA/unclear but criteria 2,3,6, and 7 were not all 'yes'; or a negative rating if majority of the answers were 'no'.

## Results

### Article identification

The PRISMA flow diagram, detailing study inclusion and exclusion at each stage, is shown in [Fig 1](#). See [S1 File](#) for the PRISMA checklist. Searches yielded 4,453 hits; after de-duplication across databases, 3,714 articles were screened at the title and abstract level. References cited in one relevant review were checked and one additional study was identified. There were 513 studies reviewed at the full-text stage. Of the 381 excluded at the full-text stage, 191 did not have any exposures of interest, 82 had no outcomes of interest, 66 did not report on the association between dietary pattern/dairy and anxiety, 30 only examined effects of supplements, 4 had no comparison group, 3 had overlapping data, 2 did not use a validated scale for anxiety, 2 had no primary data, and 1 was a relevant review. One hundred and thirty-two studies meeting the pre-defined PICOS criteria were thus included.

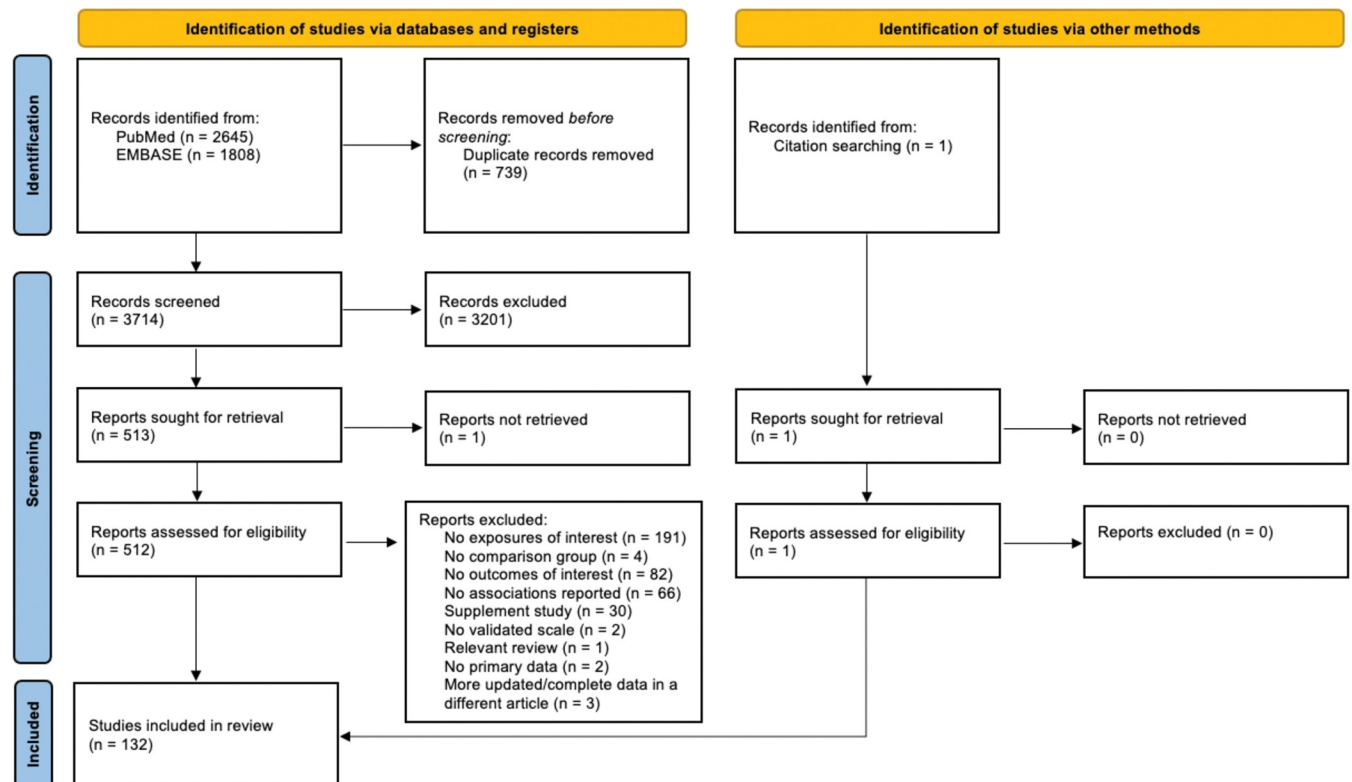

Fig 1. PRISMA study flow diagram.

<https://doi.org/10.1371/journal.pone.0295975.g001>

## Study quality of included studies

Among the 132 studies, 59 were given a positive quality rating, 72 a neutral rating, and one a negative rating. The responses for the questions in the checklist across the studies are summarized in S1 Fig. Overall, studies clearly defined the research question, selected the appropriate population, handled withdrawals, and defined exposures and outcomes well. Study quality issues were apparent in the appropriateness of the statistical analyses, specifically with confounder adjustment, and adequate reporting of methods and results.

## Study and population characteristics

The characteristics of the included studies are provided in S2 Table. Eighty-one (61%) of the 132 studies were cross-sectional, 22 (17%) were prospective cohort studies, 21 (16%) were clinical trials, 4 (3%) were case-control and 4 (3%) were other study designs. Study locations varied with the top three being Iran (n = 29), US (n = 18), and Australia (n = 16). Five studies were conducted across multiple countries. One hundred and eighteen studies included adult populations, while 7 were conducted among children and 7 included both adult and child populations. Seventy-three studies consisted of general populations, while 59 studies investigated specific populations with preexisting comorbidities such as diabetes or Celiac disease.

Many different dietary patterns were explored in these studies. Patterns examined in at least 3 studies included: Mediterranean (n = 21), gluten-free (n = 20), Healthy Eating Index (HEI) (n = 10), traditional (n = 10), diet quality score (n = 9), vegetarian and/or vegan (n = 9), Western (n = 8), low-carb (n = 7), FODMAP (fermentable oligosaccharides, disaccharides,

monosaccharides and polyols) (n = 6), “healthy” (n = 6), omnivore (n = 6), plant-based diet (n = 4), and fish diet (n = 3). Dairy product consumption was examined in 19 studies.

Anxiety was measured using various validated tools with the most common being the Hospital Anxiety and Depression Scale (n = 33), Depression Anxiety Stress Scale (n = 28), State-Trait Anxiety Inventory (n = 22), Generalized Anxiety Disorder (n = 13), and Profile of Mood States (n = 8). Herein, the focus will be on the studies that evaluated dietary patterns examined in at least 3 studies.

## Dietary patterns and anxiety

Associations observed among studies examining various dietary patterns and risk of anxiety are shown in Fig 2 and S2 Table. Twenty-one studies examined the association between Mediterranean diet and anxiety. Of these, 9 showed statistically significant inverse associations [11–19], 11 were not statistically significant [20–30], and one study showed a significant inverse association for girls while no association was observed for boys [31]. Gluten-free diet and anxiety were evaluated in 20 studies (with many conducted among Celiac disease patients) and showed inconsistent results with 7 significant positive [32–38], 6 significant inverse [39–44], and 7 non-significant associations [45–51]. Of the 10 studies examining HEI and anxiety, 6 reported a significant inverse association [52–57] while 4 did not show any significant associations [26, 58–60]. Ten studies evaluated the association between a ‘traditional’ diet, which varied based on the geographic location, and anxiety, with 3 reporting a significant inverse association [61–63], 6 showing no association [64–69], and one study noting a significant inverse association for women while no association was noted for men [70]. The relationship between diet quality score and anxiety was examined in 9 studies, with 4 studies showing significant inverse associations [52, 71–73], 4 indicating no association [7, 63, 74, 75], and 1 study reporting a significant inverse association among women but no association among men [70]. Associations between a vegetarian/vegan diet and anxiety in 9 studies were inconsistent, with 2 reporting positive significant associations [62, 76], 4 noting a significant inverse association [77–80], and 3 indicating no significant associations [34, 47, 81]. Eight studies examined a

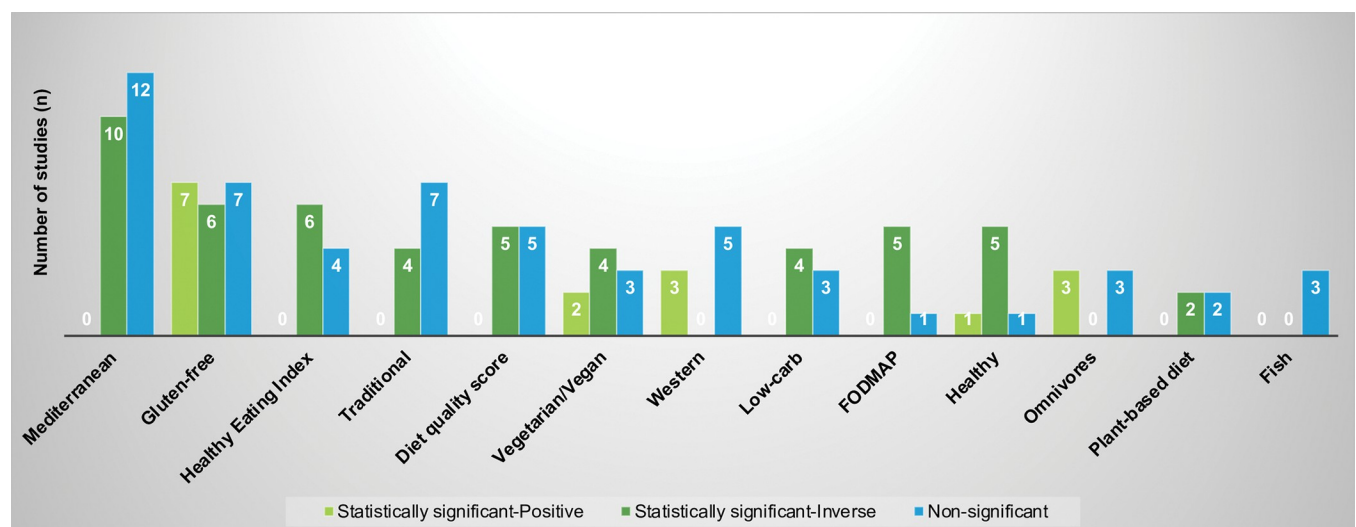

**Fig 2. Associations observed among studies examining various dietary patterns and anxiety (N = 97 studies)<sup>a</sup>.** <sup>a</sup> Of the 132 studies examining dietary patterns and anxiety, 97 studies included dietary patterns besides dairy that were examined in three or more studies and are included in this figure. Four studies were counted twice because there were relationships in different directions when subgroups were considered. Sixteen studies examined two or more dietary patterns, besides dairy.

<https://doi.org/10.1371/journal.pone.0295975.g002>



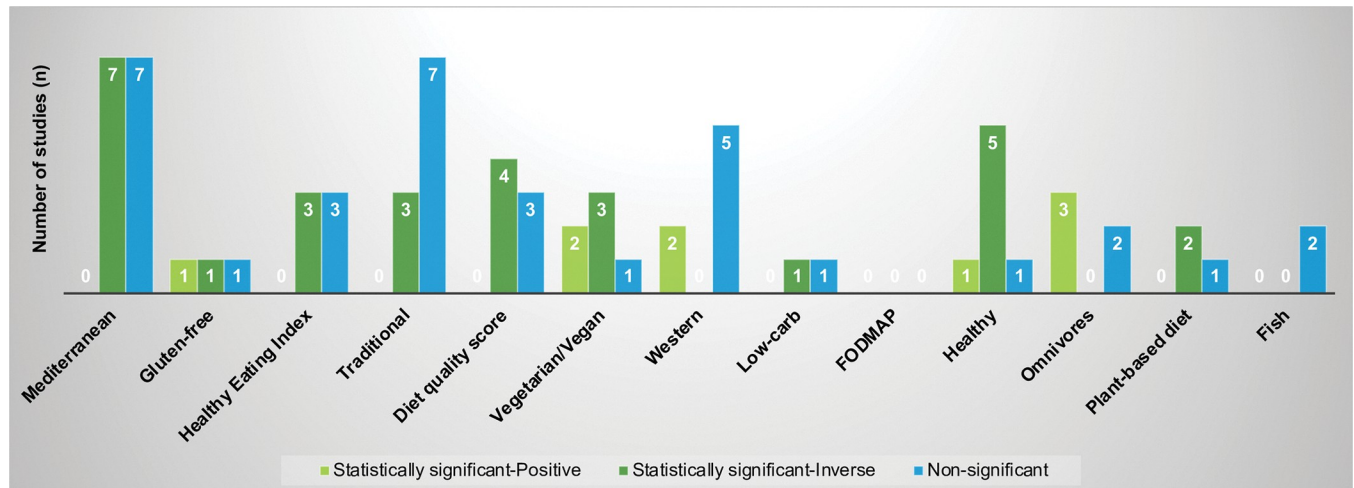

**Fig 3. Associations observed among studies examining various dietary patterns and anxiety in general populations (N = 50 studies)<sup>a</sup>.** <sup>a</sup> Of the 73 studies conducted among general populations, 50 studies included dietary patterns besides dairy that were examined in three or more studies and are included in this figure. Four studies were counted twice because there were relationships in different directions when subgroups were considered. Twelve studies examined two or more dietary patterns, besides dairy.

<https://doi.org/10.1371/journal.pone.0295975.g003>

Western diet and anxiety with 3 noting a significant positive association [65, 67, 82] and 5 not reporting an association [63, 64, 68, 70, 83].

The relationship between a low-carb diet and anxiety was explored in 7 studies, with 4 indicating a significant inverse association [84–87] and 3 not showing any association [88–90]. Of the 6 studies examining FODMAP diet and anxiety, 5 showed a significant inverse association [91–95], while the remaining study did not observe any significant associations [96]. Healthy diet and anxiety were evaluated in 6 studies, with 4 studies showing a significant inverse association [67, 97–99], one reporting no association [64], and one study noting a significant positive association for men and a significant inverse association for women [63]. Associations between an omnivore diet and anxiety were evaluated in 6 studies, with 3 reporting a significant positive association [69, 77, 78] and 3 showing no association [81, 100, 101]. Plant-based diet and anxiety were examined in 4 studies, with 2 indicating a significant inverse association [102, 103] and 2 reporting no significant associations [100, 104]. Lastly, the relationship between a diet high in fish consumption and anxiety was explored in 3 studies with all 3 reporting non-significant associations [83, 105, 106].

Of the 73 studies conducted in the general population (i.e., not selected for any specific health condition), 50 studies included dietary patterns besides dairy that were examined in three or more studies (Fig 3, S2 Table). The associations observed among these general population studies were similar to the patterns described above when all populations were considered.

Among the 7 studies that included only children, associations between dairy (n = 1), Mediterranean (n = 2), gluten-free (n = 1), traditional (n = 1), omnivore (n = 1), nutrition-related behavior score (n = 1), and protein-restricted diet (n = 1) and anxiety were examined, as shown in Fig 4 and S2 Table. Of the 2 studies examining the Mediterranean diet, one did not show any association [27] while one study reported a significant inverse association for girls and no association for boys [31]. Significant positive associations were reported for a gluten-free diet [35] and an omnivore diet [69]. Significant inverse associations were observed for dairy consumption [107], nutrition-related behavior score [108], and a protein-restricted diet [109]. There was no association between a traditional diet and risk of anxiety [69].

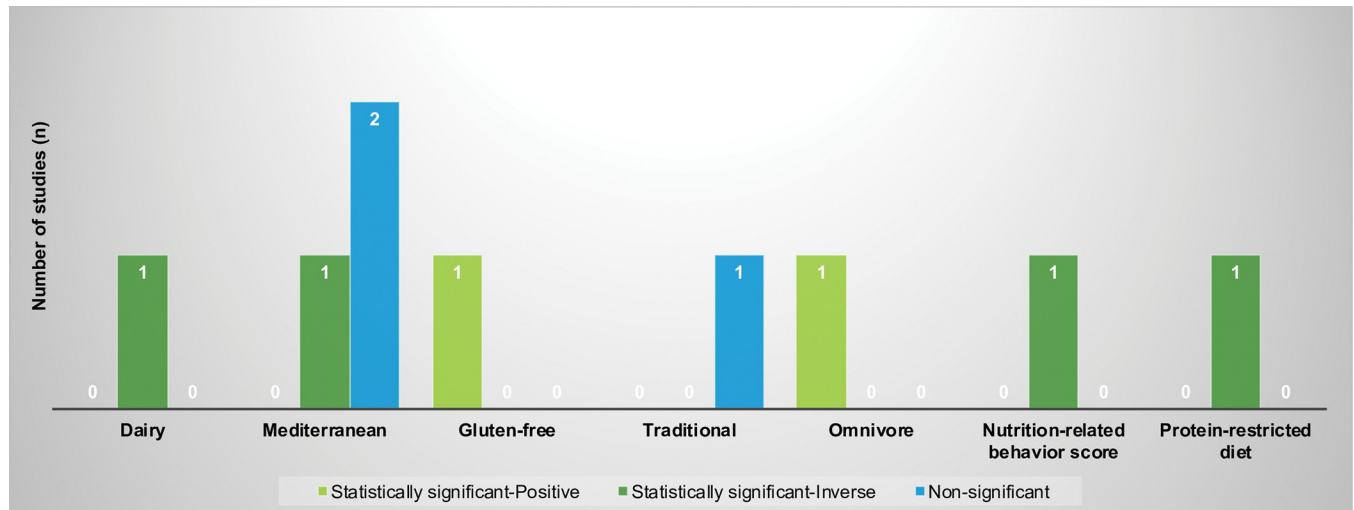

**Fig 4. Associations observed among studies examining various dietary patterns and anxiety in children (N = 7 studies)<sup>a</sup>.** <sup>a</sup> One study was counted twice because there were relationships in different directions when subgroups were considered. One study examined two dietary patterns.

<https://doi.org/10.1371/journal.pone.0295975.g004>

### Dairy consumption and anxiety

The relationship between dairy consumption and anxiety was examined in 19 studies, as shown in Fig 5 and Table 1. One study was a prospective cohort study conducted among adults and did not report any significant associations between dairy intake and the risk of anxiety [59]. The remaining 18 studies were cross-sectional, including one study conducted among children which reported a statistically significant inverse association between dairy consumption and anxiety; i.e., more dairy intake was associated with lower risk of anxiety [107]. Among the 17 cross-sectional studies of adult populations, 4 reported a statistically significant

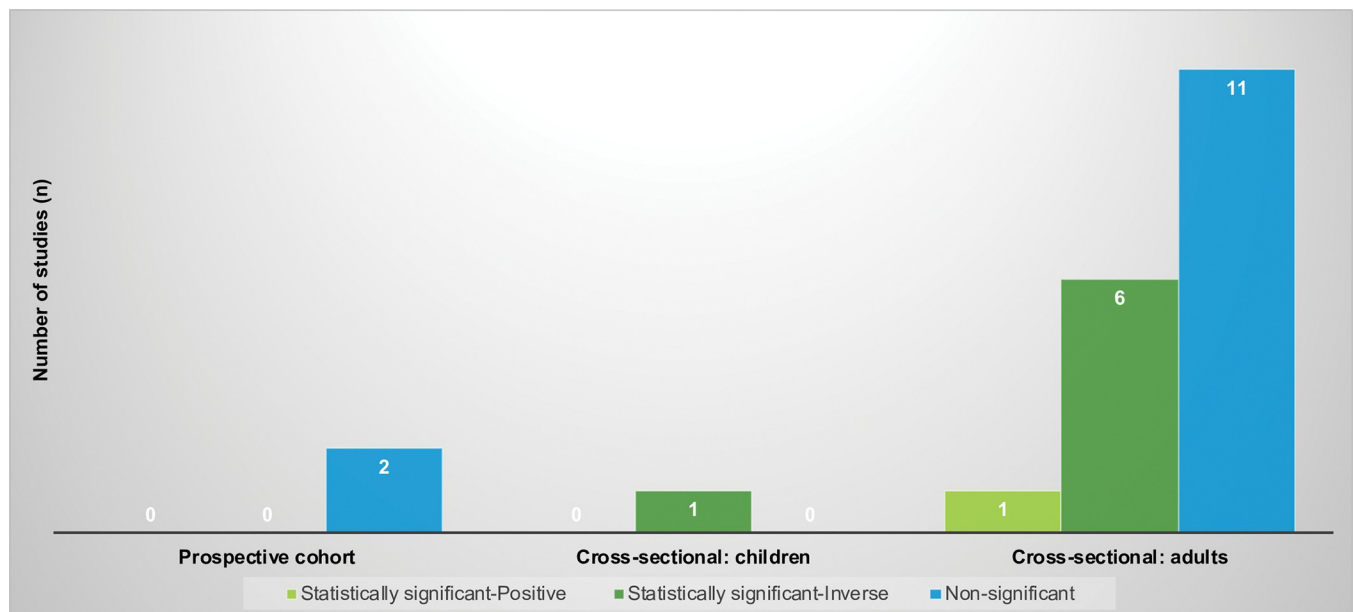

**Fig 5. Associations observed among studies examining dairy consumption and anxiety (N = 19 studies)<sup>a</sup>.** <sup>a</sup> Two studies were counted twice because there were relationships in different directions when subgroups were considered.

<https://doi.org/10.1371/journal.pone.0295975.g005>

**Table 1. Characteristics and effect measures of studies examining dairy consumption and anxiety (N = 19 studies).**

| Author (Year)            | Study Country | Study Design       | Study Period       | Study Size (N) | Population Age, Type <sup>a</sup>    | Anxiety Scale used for Assessment                 | Dairy Product Exposure     | Reported effect measures with 95% CI for risk of anxiety                                                                                        | Study Quality |
|--------------------------|---------------|--------------------|--------------------|----------------|--------------------------------------|---------------------------------------------------|----------------------------|-------------------------------------------------------------------------------------------------------------------------------------------------|---------------|
| Du (2022) [112]          | United States | Cross-sectional    | Apr-May 2020       | 1233           | Adults, General                      | GAD-7                                             | Dairy                      | β coefficient for anxiety score: -0.013; p = 0.662                                                                                              | Positive      |
| Lee (2022) [6]           | Canada        | Cross-sectional    | Aug 2018- Feb 2019 | 141            | Adults, General                      | DASS                                              | Dairy and alternatives     | β coefficient (95% CI) for anxiety score: -1.83 (-3.70, 0.03)                                                                                   | Neutral       |
| Alkhatatbeh (2021) [113] | Jordan        | Cross-sectional    | Sept 2019-Jan 2020 | 1000           | Adults, General                      | HADS                                              | Dairy calcium intake       | β coefficient for anxiety score: 0.03; p = 0.20                                                                                                 | Neutral       |
| Boaz (2021) [12]         | Multi-country | Cross-sectional    | NR                 | 3271           | Adults, General                      | GAD-7                                             | Unsweetened dairy          | Association between servings/day and anxiety score (rho, p):<br>Women: -0.07, 0.001;<br>Men: 0.01, 0.728;<br>p = 0.04                           | Neutral       |
| Ghodsii (2021) [114]     | Iran          | Cross-sectional    | Oct-Dec 2019       | 230            | Adults, General                      | DASS                                              | Total dairy                | OR (95% CI) for risk of anxiety by tertiles of consumption:<br>T1: 1.00<br>T2: 0.92 (0.38, 2.24); p = 0.864<br>T3: 0.60 (0.22, 1.63); p = 0.323 | Neutral       |
|                          |               |                    |                    |                |                                      |                                                   | Low dairy                  | OR (95% CI) for risk of anxiety by tertiles of consumption:<br>T1: 1.00<br>T2: 0.93 (0.38, 2.24); p = 0.873<br>T3: 0.42 (0.14, 1.26); p = 0.123 |               |
| Gomes (2021) [59]        | Brazil        | Prospective cohort | NR                 | 3331           | Adults, General                      | Generalized anxiety disorder-version not provided | Milk and dairy products    | OR (95% CI) for risk of anxiety: 0.95 (0.82, 1.10)                                                                                              | Neutral       |
| Mahdaviifar (2021) [5]   | Iran          | Cross-sectional    | Sept 2014-Mar 2016 | 7387           | Adults, General                      | DASS                                              | Low-fat dairy product      | OR (95% CI)<br>T1: 1.00<br>T2: 0.89 (0.73, 1.08)<br>T3: 0.79 (0.64, 0.96)<br>p-trend = 0.02                                                     | Positive      |
|                          |               |                    |                    |                |                                      |                                                   | High-fat dairy product     | OR (95% CI) for anxiety by tertile of consumption:<br>T1: 1.00<br>T2: 0.70 (0.57, 0.86)<br>T3: 0.82 (0.66, 1.02)<br>p-trend = 0.04              |               |
|                          |               |                    |                    |                |                                      |                                                   | Total dairy                | OR (95% CI) for anxiety by tertile of consumption:<br>T1: 1.00<br>T2: 0.83 (0.68, 1.01)<br>T3: 0.73 (0.59, 0.91)<br>p-trend = 0.005             |               |
|                          |               |                    |                    |                |                                      |                                                   | Low-fat milk               | OR (95% CI) for anxiety by tertile of consumption:<br>T1: 1.00<br>T2: 0.80 (0.62, 1.03)<br>T3: 0.82 (0.68, 0.99)<br>p-trend = 0.03              |               |
|                          |               |                    |                    |                |                                      |                                                   | High-fat milk              | OR (95% CI) for anxiety by tertile of consumption:<br>T1: 1.00<br>T2: 0.93 (0.70, 1.23)<br>T3: 0.82 (0.68, 1.00)<br>p-trend = 0.05              |               |
|                          |               |                    |                    |                |                                      |                                                   | Total Milk                 | OR (95% CI) for anxiety by tertile of consumption:<br>T1: 1.00<br>T2: 0.75 (0.61, 0.92)<br>T3: 0.72 (0.58, 0.88)<br>p-trend = 0.002             |               |
| Marck (2021) [7]         | Australia     | Cross-sectional    | 2016–2017          | 1490           | Adults, Specific: Multiple sclerosis | HADS, Severity of MS symptoms (MSSysMS)           | Overall dairy (yes vs. no) | β coefficient for anxiety (95% CI): 0.2 (-0.6, 1.1)                                                                                             | Neutral       |

(Continued)



Table 1. (Continued)

| Author (Year)            | Study Country | Study Design    | Study Period                                      | Study Size (N) | Population Age, Type <sup>a</sup>                         | Anxiety Scale used for Assessment                                    | Dairy Product Exposure                                            | Reported effect measures with 95% CI for risk of anxiety                                                                                                     | Study Quality |
|--------------------------|---------------|-----------------|---------------------------------------------------|----------------|-----------------------------------------------------------|----------------------------------------------------------------------|-------------------------------------------------------------------|--------------------------------------------------------------------------------------------------------------------------------------------------------------|---------------|
| Sadeghi (2021) [13]      | Iran          | Cross-sectional | 2010                                              | 3172           | Adults, General                                           | HADS                                                                 | Dairy                                                             | OR (95% CI) for anxiety by quartile of consumption:<br>Q1: 1.00<br>Q2: 0.70 (0.50, 0.98)<br>Q3: 1.15 (0.84, 1.58)<br>Q4: 0.71 (0.50, 1.00)<br>p-trend = 0.38 | Positive      |
| Vassou (2021) [14]       | Greece        | Cross-sectional | 2002–2012                                         | 853            | Adults, General                                           | STAI                                                                 | Dairy                                                             | Servings/week (mean ± SD):<br>High irrational beliefs and low-STAI: 11.6 ± 4.4<br>High irrational beliefs and high-STAI: 12 ± 5.3<br>p = 0.81                | Neutral       |
| Alkhazrajy (2020) [110]  | Iraq          | Cross-sectional | Jan-Jul 2018                                      | 400            | Adults, General                                           | HADS                                                                 | Dairy products                                                    | OR (95% CI) for risk of anxiety: 0.74 (0.55, 0.92); p = 0.041                                                                                                | Neutral       |
| Daneshzad (2020) [104]   | Iran          | Cross-sectional | NR                                                | 230            | Adults, Specific: Type 2 diabetes                         | DASS                                                                 | Low fat dairy products                                            | Mean (SE) grams/day:<br>Anxiety = No: 195.2 (11.48)<br>Anxiety = Yes: 118.3 (16.19)<br>p<0.0001                                                              | Positive      |
|                          |               |                 |                                                   |                |                                                           |                                                                      | High fat dairy products                                           | Mean (SE) grams/day:<br>Anxiety = No: 90.96 (10.25)<br>Anxiety = Yes: 168.3 (14.46)<br>p<0.0001                                                              |               |
| Gibson-Smith (2020) [16] | Netherlands   | Cross-sectional | NR                                                | 1634           | Adults, Specific: Lifetime depressive or anxiety disorder | Composite International Diagnostic Interview, Beck Anxiety Inventory | High fat dairy after correcting for all other food groups         | β coefficient for anxiety (95% CI): 0.00 (-0.05, 0.05), p = 0.99                                                                                             | Positive      |
| Khanna (2020) [107]      | India         | Cross-sectional | NR                                                | 546            | Children, General                                         | Child Behavior Checklist                                             | Consumption of milk as usual breakfast on school days, yes vs. no | Mean (SE) anxiety score by milk consumption:<br>Males:<br>Milk = No: 60.71 (0.74)<br>Milk = Yes: 57.17 (0.58)<br>p = 0.0002                                  | Neutral       |
|                          |               |                 |                                                   |                |                                                           |                                                                      |                                                                   | Females:<br>Milk = No: 62.01 (0.71)<br>Milk = Yes: 58.88 (0.75)<br>p = 0.0028                                                                                |               |
| Sangsefidi (2020) [111]  | Iran          | Cross-sectional | NR; YaHS Recruitment phase was Sept 2014-Mar 2016 | 9965           | Adults, General                                           | DASS                                                                 | Milk                                                              | OR (95% CI) for risk of anxiety:<br>None: 1.00<br>1–2 glasses/week: 0.73 (0.61, 0.87)<br>>2 glasses/week: 0.98 (0.80, 1.20)                                  | Neutral       |
|                          |               |                 |                                                   |                |                                                           |                                                                      | Yogurt                                                            | OR (95% CI) for risk of anxiety:<br>None: 1.00<br>1–2 glasses/week: 0.72 (0.52, 0.98)<br>>2 glasses/week: 0.54 (0.40, 0.73)                                  |               |
| Taylor (2020) [60]       | United States | Cross-sectional | NR                                                | 133            | Adults, General                                           | DASS                                                                 | HEI Dairy Score                                                   | β coefficient for anxiety ± SE (95% CI)<br>0.01 ± 0.03 (-0.05, 0.07), p = 0.72                                                                               | Positive      |

(Continued)

Table 1. (Continued)

| Author (Year)            | Study Country | Study Design    | Study Period | Study Size (N) | Population Age, Type <sup>a</sup>    | Anxiety Scale used for Assessment            | Dairy Product Exposure  | Reported effect measures with 95% CI for risk of anxiety                                                      | Study Quality |
|--------------------------|---------------|-----------------|--------------|----------------|--------------------------------------|----------------------------------------------|-------------------------|---------------------------------------------------------------------------------------------------------------|---------------|
| Rintamäki (2014) [115]   | Finland       | Cross-sectional | 2000–2001    | 5504           | Adults, General                      | Composite International Diagnostic Interview | Dairy products total    | Mean grams/day (95% CI)<br>Anxiety = No: 579 (566–592)<br>Anxiety = Yes: 536 (425–648)<br>p = not significant | Neutral       |
|                          |               |                 |              |                |                                      |                                              | Milk                    | Mean grams/day (95% CI)<br>Anxiety = No: 323 (314–334)<br>Anxiety = Yes: 352 (256–447)<br>p = not significant |               |
|                          |               |                 |              |                |                                      |                                              | Fermented milk products | Mean grams/day (95% CI)<br>Anxiety = No: 186 (179–193)<br>Anxiety = Yes: 117 (67–166)<br>p = not significant  |               |
|                          |               |                 |              |                |                                      |                                              | Cheese                  | Mean grams/day (95% CI)<br>Anxiety = No: 44 (43–46)<br>Anxiety = Yes: 42 (33–51)<br>p = not significant       |               |
| Forsyth (2012) [57]      | Australia     | Cross-sectional | 2006–2008    | 109            | Adults, Specific: Depression/anxiety | DASS                                         | Milk                    | Pearson's correlation coefficient with DASS score: -0.03; p>0.05                                              | Positive      |
| Yannakoulia (2008) [106] | Greece        | Cross-sectional | 2003         | 853            | Adults, General                      | STAI                                         | Dairy                   | Difference in servings/week by tertile of STAI score:<br>Women: p = 0.536<br>Men: p = 0.654                   | Positive      |

<sup>a</sup> Studies were defined as a specific population if the study was selected based on existing disease such as diabetes.

DASS, Depression, Anxiety, and Stress Scale; GAD-7, Generalized Anxiety Disorder 7; HADS, Hospital Anxiety and Depression Scale; MS, multiple sclerosis; OR, odds ratio; STAI, State-Trait Anxiety Inventory.

<https://doi.org/10.1371/journal.pone.0295975.t001>

inverse association [5, 13, 110, 111], 11 showed no association [6, 7, 14, 16, 57, 60, 106, 112–115], and 2 noted mixed associations [12, 104]. One study noted a statistically significant inverse association for women, but no association for men [12], while another study indicated a statistically significant inverse association for low-fat dairy intake and a positive association for high-fat dairy consumption [104].

Of the 19 studies on dairy consumption, 5 studies evaluated milk and anxiety [5, 57, 107, 111, 115]. In one Indian study, consumption of milk as breakfast on school days was associated with lower anxiety for both males ( $p = 0.0002$ ) and females ( $p = 0.0028$ ) [107]. There was a significant inverse association observed between consumption of 1–2 glasses/week (OR = 0.73; 95% CI: 0.61, 0.87) and anxiety in one Iranian study, but not among those who consumed >2 glasses/week (OR = 0.98; 95% CI: 0.80, 1.20) [111]. Another Iranian study noted significant inverse trends across tertiles of total milk consumption ( $p$ -trend = 0.002) and low-fat milk consumption ( $p$ -trend = 0.03) and anxiety while the trend with high-fat milk was of borderline statistical significance ( $p$ -trend = 0.05) [5]. The remaining 2 studies showed non-significant association [57, 115].

One Finnish study examined cheese and anxiety and did not report a significant association [115]. There was a significant inverse association observed between yogurt consumption and

risk of anxiety in one Iranian study (None: reference, 1–2 glasses/week: OR = 0.72 [95% CI: 0.52, 0.98], >2 glasses/week: OR = 0.54 [95% CI: 0.40, 0.73]) [111]. Fermented milk products were evaluated in one Finnish study and no associations were reported [115]. Three studies examined high-fat dairy products, with one Iranian study reporting a significant inverse association for those in tertile 2 (OR = 0.70; 95% CI: 0.57, 0.86) but not in tertile 3 and a significant trend (p-trend = 0.04) [5]. Another Iranian study reported a significant positive association with anxiety ( $p < 0.0001$ ) [104], while there was no association for high-fat dairy and anxiety in one Netherlands study after correcting for other food groups ( $p = 0.99$ ) [16]. The association between low-fat dairy products and anxiety was evaluated in 3 Iranian studies with mixed results. One study did not observe any significant associations [114] and two studies observed significant inverse associations [5, 104]. None of these studies specified the precise levels of dairy consumption.

## Discussion

This SLR identified and assessed 132 studies which examined the association between dairy consumption and/or various dietary patterns and the risk of anxiety with no restrictions on populations or geographic location. Of 19 studies evaluating dairy consumption, 7 reported a significantly lower risk of anxiety associated with increased dairy intake, while significant associations were not observed in 12 studies. Evidence for the other dietary patterns including but not limited to HEI, Mediterranean, and gluten-free diets were mixed but generally indicated a reduced risk of anxiety with greater adherence to a specific diet (e.g., more adherent to the Mediterranean diet), similar to that of dairy consumption. Inconsistencies in the direction of associations could be due to differences in study populations, time periods, locations, anxiety scales, dietary assessment, and confounder adjustment. For example, many of the study populations were specific to individuals with chronic conditions that may affect both dietary habits and risk of anxiety, such as type 2 diabetes, irritable bowel syndrome, Celiac disease, hypertension, and polycystic ovarian syndrome. Moreover, the statistical analyses differed between studies, complicating interpretation of the results across studies (e.g., odds ratios for risk of anxiety by tertile of dairy consumption, p-value for difference in anxiety score by binary measure of dairy consumption, p-value for difference in dairy servings/week among those with and without anxiety).

Most of the studies identified in this SLR were cross-sectional meaning that exposure and outcome were measured at the same point in time, making it difficult to demonstrate a temporal cause-and-effect relationship between dairy and/or dietary patterns and anxiety. As diet is a complex exposure, which involves many components that simultaneously affect health and given that individual habits and food composition change over time and that people may eat differently if they are in an anxious state, reliable measurement of dietary intakes across individuals and various populations is critical [116]. Furthermore, diet collection instruments have the potential for recall bias resulting in omission of foods consumed by individuals and/or errors in nutrient compositions from food composition tables [116]. Many of the studies in this SLR used food frequency questionnaires or other similar methods to ascertain dietary exposures and did not estimate serving sizes, so precise comparisons could not be made. Larger prospective cohort studies are needed to supplement these findings, as prospective cohorts can collect dietary intakes repeatedly over time and, as a result, minimize recall and selection biases; thus ultimately, providing stronger evidence for inferences around causality.

While the study quality metrics reflected that some studies did not adjust for confounders in their analyses, among studies with adjustment, the common confounders were age, sex, socioeconomic status, BMI, physical activity and education. Very few studies controlled for

energy intake. Variables such as use of medications prescribed for anxiety, previously diagnosed anxiety, caffeine usage, and consumption of other dietary supplements that could impact diet quality were not routinely captured or accounted for in the studies. Further, social and cultural factors related to diet may have varied within and across the populations studied. Failure to adjust for these variables may confound any relationship as people who eat healthier may tend to have better mental and physical health. Lack of confounding adjustment could be masking true associations between dairy and/or dietary patterns and anxiety. Prospective studies with robust confounder adjustment both at the design and analysis stages would strengthen the existing literature surrounding diet and anxiety.

Though the majority of the 19 studies reporting on dairy consumption and anxiety reported non-significant associations, the 7 studies that did report significance were in the same inverse direction (i.e., higher dairy intake was associated with lower risk of anxiety). While this evidence cannot support a causal conclusion given the lack of temporality in the cross-sectional nature of the studies, these findings present interesting hypotheses that merit further evaluation in prospective observational studies or clinical trials. Further, there may be variability in the components of the exposure that could be impacting the study outcome (whole fat versus low-fat, fermented products, etc.). Many essential nutrients such as vitamin D, zinc, protein, riboflavin, and vitamin B12 are found in milk and other dairy products [117]. A recently published umbrella review identified 43 meta-analyses evaluating 95 outcomes associated with zinc intake and reported that higher dietary zinc intake results in an overall lowered risk of depression [118]. This inverse association was also observed in a recent systematic review of vitamin D deficiency and psychophysiological variables which reported a reduction in depression and anxiety symptoms associated with an increase in vitamin Ds [119]. Thus, the inverse association between dairy and anxiety reported in some studies is concordant with the existing literature describing the links between specific dairy components and improved health risks. Further research is needed to fully elucidate the specific effects of dairy products on mental health outcomes.

Several mechanisms have been proposed regarding the pathways in which diet may influence mental health. A recent scoping review of diet and anxiety indicated a habitual diet impacts the gut microbiome which in turn affects the modulation of the gut peptide production involved in the gut-brain axis and neurotransmitter synthesis [2]. Additionally, a review of diet and depression acknowledged the majority of evidence in nutritional psychiatry is from preclinical animal studies and noted that diet impacts mental health through modulation of pathways such as oxidative stress, gut microbiota, epigenetics, neurogenesis, inflammation, and the hypothalamic-pituitary-adrenal axis [120]. One proposed mechanism for the impact of dairy on anxiety is through serotonin production, which requires tryptophan and calcium, available in dairy products [112]. Since low levels of serotonin have been linked with higher anxiety, increasing serotonin production through dairy consumption could potentially improve mental health [112]. Interventional studies with clinically diagnosed human populations are needed to better elucidate the complex pathways associating diet with health outcomes such as anxiety.

There are several limitations to this systematic review. The use of food frequency questionnaires in many of the studies might not be accurately reflecting individuals' dietary patterns given the potential for measurement error associated with participant recall. There was also a lack of consistency in the specific anxiety instruments used across studies. Individuals with preexisting anxiety were not excluded, which could create bias in the effect measures observed in the studies. Due to the design of the studies obtained in the course of this SLR, we were unable to parse out whether any observed associations were between a specific dietary pattern or rather the commitment to following an eating pattern in general. Finally, most studies in

this landscape are cross-sectional in nature which both precludes the collection of dietary intakes over time and limits the ability to demonstrate a cause-and-effect relationship between dairy or various dietary patterns and anxiety. Strengths of this SLR include the use of rigorous methodology including the PRISMA guidelines, assessment of study quality, 100% quality control of the abstraction and study quality determinations, and examination of multiple dietary patterns across the globe with no restrictions on populations.

This SLR suggests the potential for dairy and various dietary patterns to impact the risk of anxiety across a variety of populations. Future studies with longitudinal design, clearly defined eligibility criteria, and strong dietary assessment methodology are needed to better understand the complex relationships between diet and anxiety. The benefits of such knowledge to public health are vast as diet is a modifiable risk factor and tailored interventions have the potential to improve the mental well-being of millions of individuals.

## Supporting information

**S1 File. PRISMA checklist 2020.**

(DOCX)

**S1 Fig. Summary of study quality scores for the included studies (N = 132).**

(TIFF)

**S1 Table. Literature search strategy.**

(XLSX)

**S2 Table. Characteristics and effect measures of the included studies, organized by publication year (N = 132 studies).**

(XLSX)

## Author Contributions

**Conceptualization:** Naimisha Movva, Lauren C. Bylsma, Sarah S. Cohen.

**Data curation:** Naimisha Movva, Heidi Reichert, Naushin Hooda, Lauren C. Bylsma, Meghan Mitchell, Sarah S. Cohen.

**Formal analysis:** Naimisha Movva, Sarah S. Cohen.

**Funding acquisition:** Sarah S. Cohen.

**Investigation:** Naimisha Movva, Heidi Reichert, Naushin Hooda, Sarah S. Cohen.

**Methodology:** Naimisha Movva, Lauren C. Bylsma, Meghan Mitchell, Sarah S. Cohen.

**Project administration:** Naimisha Movva, Sarah S. Cohen.

**Supervision:** Naimisha Movva, Sarah S. Cohen.

**Visualization:** Naimisha Movva, Sarah S. Cohen.

**Writing – original draft:** Naimisha Movva, Heidi Reichert, Naushin Hooda, Lauren C. Bylsma, Meghan Mitchell, Sarah S. Cohen.

**Writing – review & editing:** Naimisha Movva, Heidi Reichert, Naushin Hooda, Lauren C. Bylsma, Meghan Mitchell, Sarah S. Cohen.

## References

1. Bandelow B. and Michaelis S., "Epidemiology of anxiety disorders in the 21st century," (in eng), *Dialogues Clin Neurosci*, vol. 17, no. 3, pp. 327–35, Sep 2015, <https://doi.org/10.31887/DCNS.2015.17.3/bbandelow> PMID: 26487813
2. Aucoin M. et al., "Diet and Anxiety: A Scoping Review," (in eng), *Nutrients*, vol. 13, no. 12, Dec 10 2021, <https://doi.org/10.3390/nu13124418> PMID: 34959972
3. (2020). *Dietary Guidelines for Americans, 2020–2025*. [Online] Available: [https://www.dietaryguidelines.gov/sites/default/files/2020-12/Dietary\\_Guidelines\\_for\\_Americans\\_2020-2025.pdf](https://www.dietaryguidelines.gov/sites/default/files/2020-12/Dietary_Guidelines_for_Americans_2020-2025.pdf)
4. Hockey M., McGuinness A. J., Marx W., Rocks T., Jacka F. N., and Ruusunen A., "Is dairy consumption associated with depressive symptoms or disorders in adults? A systematic review of observational studies," (in eng), *Crit Rev Food Sci Nutr*, vol. 60, no. 21, pp. 3653–3668, 2020, <https://doi.org/10.1080/10408398.2019.1703641> PMID: 31868529
5. MahdaviFar B., Hosseinzadeh M., Salehi-Abargouei A., Mirzaei M., and Vafa M., "The association between dairy products and psychological disorders in a large sample of Iranian adults," (in eng), *Nutr Neurosci*, pp. 1–11, Sep 11 2021, <https://doi.org/10.1080/1028415x.2021.1969065> PMID: 34514970
6. Lee C. T., Ting G. K., Bellissimo N., and Khalesi S., "The associations between lifestyle factors and mental well-being in baccalaureate nursing students: An observational study," (in eng), *Nurs Health Sci*, vol. 24, no. 1, pp. 255–264, Mar 2022, <https://doi.org/10.1111/nhs.12923> PMID: 35080779
7. Marck C. H., Probst Y., Chen J., Taylor B., and van der Mei I., "Dietary patterns and associations with health outcomes in Australian people with multiple sclerosis," (in eng), *Eur J Clin Nutr*, vol. 75, no. 10, pp. 1506–1514, Oct 2021, <https://doi.org/10.1038/s41430-021-00864-y> PMID: 33531638
8. Page M. J. et al., "The PRISMA 2020 statement: an updated guideline for reporting systematic reviews," (in eng), *Bmj*, vol. 372, p. n71, Mar 29 2021, <https://doi.org/10.1136/bmj.n71> PMID: 33782057
9. DistillerSR, "DistillerSR. Evidence Partners; 2022. <https://www.evidencepartners.com/>," 2022.
10. Academy of Nutrition and Dietetics, "Evidence Analysis Manual: Steps in the Academy Evidence Analysis Process," Chicago, IL, 2016. [Online]. Available: [https://www.andean.org/vault/2440/web/files/2016\\_April\\_EA\\_Manual.pdf](https://www.andean.org/vault/2440/web/files/2016_April_EA_Manual.pdf)
11. Kaufman-Shriqui V., Navarro D. A., Raz O., and Boaz M., "Dietary changes and anxiety during the coronavirus pandemic: a multinational survey," (in eng), *Eur J Clin Nutr*, vol. 76, no. 1, pp. 84–92, Jan 2022, <https://doi.org/10.1038/s41430-021-00897-3> Epub 2021 Mar 19. PMID: 33742156
12. Boaz M., Navarro D. A., Raz O., and Kaufman-Shriqui V., "Dietary Changes and Anxiety during the Coronavirus Pandemic: Differences between the Sexes," (in eng), *Nutrients*, vol. 13, no. 12, Nov 23 2021, <https://doi.org/10.3390/nu13124193> PMID: 34959744
13. Sadeghi O., Keshteli A. H., Afshar H., Esmailzadeh A., and Adibi P., "Adherence to Mediterranean dietary pattern is inversely associated with depression, anxiety and psychological distress," (in eng), *Nutr Neurosci*, vol. 24, no. 4, pp. 248–259, Apr 2021, <https://doi.org/10.1080/1028415X.2019.1620425> Epub 2019 Jun 11. PMID: 31185883
14. Vassou C., Yannakoulia M., Georgousopoulou E. N., Pitsavos C., Cropley M., and Panagiotakos D. B., "Foods, Nutrients and Dietary Patterns in Relation to Irrational Beliefs and Related Psychological Disorders: The ATTICA Epidemiological Study," (in eng), *Nutrients*, vol. 13, no. 5, Apr 27 2021, <https://doi.org/10.3390/nu13051472> PMID: 33925406
15. Spanaki C. et al., "The Christian Orthodox Church Fasting Diet Is Associated with Lower Levels of Depression and Anxiety and a Better Cognitive Performance in Middle Life," (in eng), *Nutrients*, vol. 13, no. 2, Feb 15 2021, <https://doi.org/10.3390/nu13020627> PMID: 33671993
16. Gibson-Smith D., Bot M., Brouwer I. A., Visser M., Giltay E. J., and Penninx B., "Association of food groups with depression and anxiety disorders," (in eng), *Eur J Nutr*, vol. 59, no. 2, pp. 767–778, Mar 2020, <https://doi.org/10.1007/s00394-019-01943-4> Epub 2019 Apr 3. PMID: 30945032
17. Wade A. T. et al., "A Mediterranean diet supplemented with dairy foods improves mood and processing speed in an Australian sample: results from the MedDairy randomized controlled trial," (in English), *Nutritional Neuroscience*, Article vol. 23, no. 8, pp. 646–658, 2020, <https://doi.org/10.1080/1028415X.2018.1543148> PMID: 30409085
18. Francis H. M., Stevenson R. J., Chambers J. R., Gupta D., Newey B., and Lim C. K., "A brief diet intervention can reduce symptoms of depression in young adults—A randomised controlled trial," (in eng), *PLoS One*, vol. 14, no. 10, p. e0222768, 2019, <https://doi.org/10.1371/journal.pone.0222768> eCollection 2019. PMID: 31596866
19. Georgousopoulou E. N. et al., "Association between mediterranean diet and non-fatal cardiovascular events, in the context of anxiety and depression disorders: a case/case-control study," (in eng), *Hellenic J Cardiol*, vol. 55, no. 1, pp. 24–31, Jan-Feb 2014. PMID: 24491932



20. Bonaccio M. et al., "Psychological distress resulting from the COVID-19 confinement is associated with unhealthy dietary changes in two Italian population-based cohorts," (in eng), *Eur J Nutr*, vol. 61, no. 3, pp. 1491–1505, Apr 2022, <https://doi.org/10.1007/s00394-021-02752-4> Epub 2021 Nov 30. PMID: 34846604
21. Spyridaki A. et al., "Adherence to the Mediterranean diet is linked to reduced psychopathology in female celiac disease patients," (in English), *Psychology, health & medicine*, Article in Press pp. 1–6, 2022, <https://doi.org/10.1080/13548506.2022.2052329> PMID: 35282714
22. Kaya A. Ş., Sarıteke Y., and Özkan H. M., "The effects of dietary inositol on dimensional obsessive compulsive scale score," (in English), *Progress in Nutrition*, Article vol. 23, no. 3, 2021, <https://doi.org/10.23751/pn.v23i3.11020>
23. Hardman R. J., Meyer D., Kennedy G., MacPherson H., Scholey A. B., and Pipingas A., "Findings of a Pilot Study Investigating the Effects of Mediterranean Diet and Aerobic Exercise on Cognition in Cognitively Healthy Older People Living Independently within Aged-Care Facilities: The Lifestyle Intervention in Independent Living Aged Care (LILAC) Study," (in English), *Current Developments in Nutrition*, Article vol. 4, no. 5, 2020, <https://doi.org/10.1093/cdn/nzaa077> PMID: 32440639
24. Migliaretti G. et al., "Metabolic and psychological effects of short-term increased consumption of less-processed foods in daily diets: A Pilot Study," (in eng), *Diabetes Metab*, vol. 46, no. 1, pp. 66–69, Feb 2020, <https://doi.org/10.1016/j.diabet.2019.07.002> Epub 2019 Jul 17. PMID: 31325499
25. Parletta N. et al., "A Mediterranean-style dietary intervention supplemented with fish oil improves diet quality and mental health in people with depression: A randomized controlled trial (HELFIMED)," (in English), *Nutritional Neuroscience*, Article vol. 22, no. 7, pp. 474–487, 2019, <https://doi.org/10.1080/1028415X.2017.1411320> PMID: 29215971
26. Gibson-Smith D., Bot M., Brouwer I. A., Visser M., and Penninx B., "Diet quality in persons with and without depressive and anxiety disorders," (in eng), *J Psychiatr Res*, vol. 106, pp. 1–7, Nov 2018, <https://doi.org/10.1016/j.jpsychires.2018.09.006> Epub 2018 Sep 12. PMID: 30240962
27. Tehrani A. N. et al., "Adherence to Mediterranean dietary pattern and depression, anxiety and stress among high-school female adolescents," (in English), *Mediterranean Journal of Nutrition and Metabolism*, Article vol. 11, no. 1, pp. 73–83, 2018, <https://doi.org/10.3233/MNM-17192>
28. Bertoli S. et al., "Adherence to the Mediterranean diet is inversely related to binge eating disorder in patients seeking a weight loss program," (in eng), *Clin Nutr*, vol. 34, no. 1, pp. 107–114, Feb 2015, <https://doi.org/10.1016/j.clnu.2014.02.001> Epub 2014 Feb 7. PMID: 24559856
29. Oliveira C. et al., "Mediterranean diet is associated on symptoms of depression and anxiety in patients with bronchiectasis," (in eng), *Gen Hosp Psychiatry*, vol. 36, no. 3, pp. 277–83, May-Jun 2014, <https://doi.org/10.1016/j.genhosppsy.2014.01.010> Epub 2014 Jan 31. PMID: 24602964
30. Crichton G. E., Bryan J., Hodgson J. M., and Murphy K. J., "Mediterranean diet adherence and self-reported psychological functioning in an Australian sample," (in eng), *Appetite*, vol. 70, pp. 53–9, Nov 2013, <https://doi.org/10.1016/j.appet.2013.06.088> Epub 2013 Jul 2. PMID: 23831151
31. Voltas N., Arija V., Aparicio E., and Canals J., "Longitudinal study of psychopathological, anthropometric and sociodemographic factors related to the level of Mediterranean diet adherence in a community sample of Spanish adolescents," (in eng), *Public Health Nutr*, vol. 19, no. 10, pp. 1812–22, Jul 2016, <https://doi.org/10.1017/S1368980015003560> Epub 2016 Jan 28. PMID: 26818065
32. Bascuñán K. A., Rodríguez J. M., Osben C., Fernández A., Sepúlveda C., and Araya M., "Pandemic Effects and Gluten-Free Diet: An Adherence and Mental Health Problem," (in eng), *Nutrients*, vol. 13, no. 6, May 27 2021, <https://doi.org/10.3390/nu13061822> PMID: 34071870
33. Barberis N., Quattropani M. C., and Cuzzocrea F., "Relationship between motivation, adherence to diet, anxiety symptoms, depression symptoms and quality of life in individuals with celiac disease," (in eng), *J Psychosom Res*, vol. 124, p. 109787, Sep 2019, <https://doi.org/10.1016/j.jpsychores.2019.109787> Epub 2019 Jul 23. PMID: 31443802
34. Schreiner P. et al., "Vegetarian or gluten-free diets in patients with inflammatory bowel disease are associated with lower psychological well-being and a different gut microbiota, but no beneficial effects on the course of the disease," (in English), *United European Gastroenterology Journal*, Article vol. 7, no. 6, pp. 767–781, 2019, <https://doi.org/10.1177/2050640619841249> PMID: 31316781
35. Mazzone L. et al., "Compliant gluten-free children with celiac disease: an evaluation of psychological distress," (in eng), *BMC Pediatr*, vol. 11, p. 46, May 27 2011, <https://doi.org/10.1186/1471-2431-11-46> PMID: 21619651
36. Häuser W., Janke K. H., Klump B., Gregor M., and Hinz A., "Anxiety and depression in adult patients with celiac disease on a gluten-free diet," (in eng), *World J Gastroenterol*, vol. 16, no. 22, pp. 2780–7, Jun 14 2010, <https://doi.org/10.3748/wjg.v16.i22.2780> PMID: 20533598

37. Zingone F. et al., "The quality of sleep in patients with coeliac disease," (in eng), *Aliment Pharmacol Ther*, vol. 32, no. 8, pp. 1031–6, Oct 2010, <https://doi.org/10.1111/j.1365-2036.2010.04432.x> Epub 2010 Aug 16. PMID: 20937049
38. Fera T., Cascio B., Angelini G., Martini S., and Guidetti C. S., "Affective disorders and quality of life in adult coeliac disease patients on a gluten-free diet," (in eng), *Eur J Gastroenterol Hepatol*, vol. 15, no. 12, pp. 1287–92, Dec 2003, <https://doi.org/10.1097/00042737-200312000-00006> PMID: 14624151
39. Parker S. et al., "Functional Gastrointestinal Disorders and Associated Health Impairment in Individuals with Celiac Disease," (in eng), *Clin Gastroenterol Hepatol*, vol. 20, no. 6, pp. 1315–1325.e4, Jun 2022, <https://doi.org/10.1016/j.cgh.2021.07.026> Epub 2021 Jul 21. PMID: 34298190
40. Canova C. et al., "Quality of Life and Psychological Disorders in Coeliac Disease: A Prospective Multi-centre Study," (in eng), *Nutrients*, vol. 13, no. 9, Sep 16 2021, <https://doi.org/10.3390/nu13093233> PMID: 34579108
41. Aziz I., Trott N., Briggs R., North J. R., Hadjivassiliou M., and Sanders D. S., "Efficacy of a Gluten-Free Diet in Subjects With Irritable Bowel Syndrome-Diarrhea Unaware of Their HLA-DQ2/8 Genotype," (in eng), *Clin Gastroenterol Hepatol*, vol. 14, no. 5, pp. 696–703.e1, May 2016, <https://doi.org/10.1016/j.cgh.2015.12.031> Epub 2015 Dec 31. PMID: 26748221
42. Kurppa K. et al., "Benefits of a gluten-free diet for asymptomatic patients with serologic markers of celiac disease," (in eng), *Gastroenterology*, vol. 147, no. 3, pp. 610–617.e1, Sep 2014, <https://doi.org/10.1053/j.gastro.2014.05.003> Epub 2014 May 13. PMID: 24837306
43. Collin P., Kaukinen K., Mattila A. K., and Joukamaa M., "Psychoneurotic symptoms and alexithymia in coeliac disease," (in eng), *Scand J Gastroenterol*, vol. 43, no. 11, pp. 1329–33, 2008, <https://doi.org/10.1080/00365520802240248> PMID: 18622804
44. Addolorato G. et al., "Anxiety but not depression decreases in coeliac patients after one-year gluten-free diet: a longitudinal study," (in eng), *Scand J Gastroenterol*, vol. 36, no. 5, pp. 502–6, May 2001, <https://doi.org/10.1080/00365520119754> PMID: 11346203
45. Rostami-Nejad M. et al., "Anxiety Symptoms in Adult Celiac Patients and the Effect of a Gluten-Free Diet: An Iranian Nationwide Study," (in English), *Inflammatory Intestinal Diseases*, Article vol. 5, no. 1, pp. 42–48, 2020, <https://doi.org/10.1159/000505657> PMID: 32232054
46. Kristensen V. A., Valeur J., Brackmann S., Jahnsen J., Brunborg C., and Tveito K., "Attention deficit and hyperactivity disorder symptoms respond to gluten-free diet in patients with coeliac disease," (in eng), *Scand J Gastroenterol*, vol. 54, no. 5, pp. 571–576, May 2019, <https://doi.org/10.1080/00365521.2019.1608467> Epub 2019 May 3. PMID: 31050907
47. Norwood R., Cruwys T., Chachay V. S., and Sheffield J., "The psychological characteristics of people consuming vegetarian, vegan, paleo, gluten free and weight loss dietary patterns," (in English), *Obesity Science and Practice*, Article vol. 5, no. 2, pp. 148–158, 2019, <https://doi.org/10.1002/osp4.325> PMID: 31019732
48. Calasso M., Francavilla R., Cristofori F., De Angelis M., and Gobetti M., "New Protocol for Production of Reduced-Gluten Wheat Bread and Pasta and Clinical Effect in Patients with Irritable Bowel Syndrome: A randomised, Double-Blind, Cross-Over Study," (in eng), *Nutrients*, vol. 10, no. 12, Dec 2 2018, <https://doi.org/10.3390/nu10121873> PMID: 30513824
49. Slim M. et al., "The Effects of a Gluten-free Diet Versus a Hypocaloric Diet Among Patients With Fibromyalgia Experiencing Gluten Sensitivity-like Symptoms: A Pilot, Open-Label Randomized Clinical Trial," (in eng), *J Clin Gastroenterol*, vol. 51, no. 6, pp. 500–507, Jul 2017, <https://doi.org/10.1097/MCG.0000000000000651> PMID: 27548732
50. Barratt S. M., Leeds J. S., and Sanders D. S., "Quality of life in Coeliac Disease is determined by perceived degree of difficulty adhering to a gluten-free diet, not the level of dietary adherence ultimately achieved," (in eng), *J Gastrointest Liver Dis*, vol. 20, no. 3, pp. 241–5, Sep 2011. PMID: 21961090
51. Addolorato G. et al., "Social phobia in coeliac disease," (in eng), *Scand J Gastroenterol*, vol. 43, no. 4, pp. 410–5, 2008, <https://doi.org/10.1080/00365520701768802> PMID: 18365905
52. Daneshzad E. et al., "Diet quality indices are associated with sleep and mental health status among diabetic women: a cross-sectional study," (in English), *Eating and Weight Disorders*, Article in Press 2021, <https://doi.org/10.1007/s40519-021-01294-2> PMID: 34480747
53. Burrows K. et al., "Association of poorer dietary quality and higher dietary inflammation with greater symptom severity in depressed individuals with appetite loss," (in eng), *J Affect Disord*, vol. 263, pp. 99–106, Feb 15 2020, <https://doi.org/10.1016/j.jad.2019.11.160> Epub 2019 Dec 2. PMID: 31818803
54. Isgin-Atici K., Kanbur N., Akgül S., and Buyuktuncer Z., "Diet quality in adolescents with premenstrual syndrome: A cross-sectional study," (in eng), *Nutr Diet*, vol. 77, no. 3, pp. 351–358, Jul 2020, <https://doi.org/10.1111/1747-0080.12515> Epub 2019 Feb 6. PMID: 30729645

55. Trude A. C. B., Black M. M., Surkan P. J., Hurley K. M., and Wang Y., "Maternal anxiety and diet quality among mothers and toddlers from low-income households," (in eng), *Matern Child Nutr*, vol. 16, no. 4, p. e12992, Oct 2020, <https://doi.org/10.1111/mcn.12992> Epub 2020 Mar 8. PMID: 32147951
56. Saneei P., Hajishafiee M., Keshteli A. H., Afshar H., Esmailzadeh A., and Adibi P., "Adherence to Alternative Healthy Eating Index in relation to depression and anxiety in Iranian adults," (in eng), *Br J Nutr*, vol. 116, no. 2, pp. 335–42, Jul 2016, <https://doi.org/10.1017/S0007114516001926> Epub 2016 May 18. PMID: 27188471
57. Forsyth A. K., Williams P. G., and Deane F. P., "Nutrition status of primary care patients with depression and anxiety," (in eng), *Aust J Prim Health*, vol. 18, no. 2, pp. 172–6, 2012, <https://doi.org/10.1071/PY11023> PMID: 22551840
58. Christensen N., van Woerden I., Aubuchon-Endsley N. L., Fleckenstein P., Olsen J., and Blanton C., "Diet Quality and Mental Health Status among Division 1 Female Collegiate Athletes during the COVID-19 Pandemic," (in eng), *Int J Environ Res Public Health*, vol. 18, no. 24, Dec 19 2021, <https://doi.org/10.3390/ijerph182413377> PMID: 34948985
59. A. P. Gomes et al., "Do inflammation and adiposity mediate the association of diet quality with depression and anxiety in young adults?," (in eng), *Clin Nutr*, vol. 40, no. 5, pp. 2800–2808, May 2021, <https://doi.org/10.1016/j.clnu.2021.03.028> Epub 2021 Apr 7. PMID: 33933746
60. Taylor A. M., Thompson S. V., Edwards C. G., MUSAAD S. M. A., Khan N. A., and Holscher H. D., "Associations among diet, the gastrointestinal microbiota, and negative emotional states in adults," (in eng), *Nutr Neurosci*, vol. 23, no. 12, pp. 983–992, Dec 2020, <https://doi.org/10.1080/1028415X.2019.1582578> Epub 2019 Feb 22. PMID: 30794085
61. Canheta A. B. D. S., Santos A. S. E. A. D. C., Souza J. D. D., and Silveira E. A., "Traditional Brazilian diet and extra virgin olive oil reduce symptoms of anxiety and depression in individuals with severe obesity: Randomized clinical trial," (in English), *Clinical Nutrition*, Article vol. 40, no. 2, pp. 404–411, 2021, <https://doi.org/10.1016/j.clnu.2020.05.046> PMID: 32675019
62. Vaz Jdos S., Kac G., Emmett P., Davis J. M., Golding J., and Hibbeln J. R., "Dietary patterns, n-3 fatty acids intake from seafood and high levels of anxiety symptoms during pregnancy: findings from the Avon Longitudinal Study of Parents and Children," (in eng), *PLoS One*, vol. 8, no. 7, p. e67671, 2013, <https://doi.org/10.1371/journal.pone.0067671> Print 2013. PMID: 23874437
63. Jacka F. N. et al., "Association of Western and traditional diets with depression and anxiety in women," (in eng), *Am J Psychiatry*, vol. 167, no. 3, pp. 305–11, Mar 2010, <https://doi.org/10.1176/appi.ajp.2009.09060881> Epub 2010 Jan 4. PMID: 20048020
64. Janmohammadi P., Daneshzad E., Alipour T., Heshmati J., Eshaghi H., and Mirzaei K., "Is there any association between dietary patterns, food security status and psychiatric disorders among Iranian earthquake victims?," (in eng), *BMJ Mil Health*, vol. 167, no. 3, pp. 153–157, Jun 2021, <https://doi.org/10.1136/jramc-2019-001301> Epub 2020 Feb 20. PMID: 32086271
65. Xu F., Chong B. Q., Cai T., Zhang J. L., and Lv J., "Associations between major dietary patterns and anxiety in middle-aged adults in eastern China," (in eng), *Public Health Nutr*, vol. 24, no. 7, pp. 1716–1724, May 2021, <https://doi.org/10.1017/S1368980020000221> Epub 2020 May 15. PMID: 32408927
66. Teo C. et al., "Prospective Associations of Maternal Dietary Patterns and Postpartum Mental Health in a Multi-Ethnic Asian Cohort: The Growing up in Singapore towards Healthy Outcomes (GUSTO) Study," (in eng), *Nutrients*, vol. 10, no. 3, Mar 2 2018, <https://doi.org/10.3390/nu10030299> PMID: 29498695
67. Yazdi M., Roohafza H., Feizi A., Rabiei K., and Sarafzadegan N., "The influence of dietary patterns and stressful life events on psychological problems in a large sample of Iranian industrial employees: Structural equations modeling approach," (in eng), *J Affect Disord*, vol. 236, pp. 140–148, Aug 15 2018, <https://doi.org/10.1016/j.jad.2018.04.120> Epub 2018 Apr 27. PMID: 29734097
68. Hosseinzadeh M. et al., "Empirically derived dietary patterns in relation to psychological disorders," (in eng), *Public Health Nutr*, vol. 19, no. 2, pp. 204–17, Feb 2016, <https://doi.org/10.1017/S136898001500172X> Epub 2015 Jun 10. PMID: 26061411
69. Weng T. T. et al., "Is there any relationship between dietary patterns and depression and anxiety in Chinese adolescents?," (in eng), *Public Health Nutr*, vol. 15, no. 4, pp. 673–82, Apr 2012, <https://doi.org/10.1017/S1368980011003077> Epub 2011 Nov 25. PMID: 22115495
70. Jacka F. N., Mykletun A., Berk M., Bjelland I., and Tell G. S., "The association between habitual diet quality and the common mental disorders in community-dwelling adults: the Hordaland Health study," (in eng), *Psychosom Med*, vol. 73, no. 6, pp. 483–90, Jul-Aug 2011, <https://doi.org/10.1097/PSY.0b013e318222831a> Epub 2011 Jun 28. PMID: 21715296
71. Durán-Agüero S. et al., "Psychological factors of diet quality among rural populations of Latin America during the COVID-19 pandemic: a cross-sectional study," (in eng), *Rural Remote Health*, vol. 22, no. 1, p. 6909, Mar 2022, <https://doi.org/10.22605/RRH6909> Epub 2022 Mar 9. PMID: 35263545

72. S. R. Walton et al., "Health-promoting behaviours and concussion history are associated with cognitive function, mood-related symptoms and emotional-behavioural dyscontrol in former NFL players: an NFL-LONG Study," (in eng), *Br J Sports Med*, vol. 55, no. 12, pp. 683–690, Jun 2021, <https://doi.org/10.1136/bjsports-2020-103400> Epub 2021 Jan 4. PMID: 33397673
73. Darooghegi Mofrad M., Siassi F., Guilani B., Bellissimo N., Suito K., and Azadbakht L., "The association of food quality index with mental health in women: a cross-sectional study," (in eng), *BMC Res Notes*, vol. 13, no. 1, p. 557, Dec 9 2020, <https://doi.org/10.1186/s13104-020-05401-x> PMID: 33298144
74. Nguyen T. P. et al., "Dietary quality and nutrient intake in adults with obsessive-compulsive disorder," (in English), *BJPsych Open*, Article vol. 7, no. 6, 2021, <https://doi.org/10.1192/bjo.2021.1039>
75. Szlejf C. et al., "Poorer cardiovascular health is associated with psychiatric comorbidity: results from the ELSA-Brasil Study," (in eng), *Int J Cardiol*, vol. 274, pp. 358–365, Jan 1 2019, <https://doi.org/10.1016/j.ijcard.2018.06.037> Epub 2018 Jun 12. PMID: 29921514
76. Lavallee K., Zhang X. C., Michalak J., Schneider S., and Margraf J., "Vegetarian diet and mental health: Cross-sectional and longitudinal analyses in culturally diverse samples," (in eng), *J Affect Disord*, vol. 248, pp. 147–154, Apr 1 2019, <https://doi.org/10.1016/j.jad.2019.01.035> Epub 2019 Jan 29. PMID: 30731282
77. Beezhold B., Radnitz C., Rinne A., and Di Matteo J., "Vegans report less stress and anxiety than omnivores," (in English), *Nutritional Neuroscience*, Article vol. 18, no. 7, pp. 289–296, 2015, <https://doi.org/10.1179/1476830514Y.0000000164> PMID: 25415255
78. Beezhold B. L., Johnston C. S., and Daigle D. R., "Vegetarian diets are associated with healthy mood states: a cross-sectional study in seventh day adventist adults," (in eng), *Nutr J*, vol. 9, p. 26, Jun 1 2010, <https://doi.org/10.1186/1475-2891-9-26> PMID: 20515497
79. Link L. B., Hussaini N. S., and Jacobson J. S., "Change in quality of life and immune markers after a stay at a raw vegan institute: a pilot study," (in eng), *Complement Ther Med*, vol. 16, no. 3, pp. 124–30, Jun 2008, <https://doi.org/10.1016/j.ctim.2008.02.004> Epub 2008 Apr 8. PMID: 18534324
80. Agarwal U., Mishra S., Xu J., Levin S., Gonzales J., and Barnard N. D., "A multicenter randomized controlled trial of a nutrition intervention program in a multiethnic adult population in the corporate setting reduces depression and anxiety and improves quality of life: the GEICO study," *American journal of health promotion: AJHP*, vol. 29, no. 4, 2015, <https://doi.org/10.4278/ajhp.130218-QUAN-72> PMID: 24524383
81. Kjeldsen-Kragh J., Haugen T. M., Forre O., Laache H., and Malt U. F., "Vegetarian diet for patients with rheumatoid arthritis: Can the clinical effects be explained by the psychological characteristics of the patients?," (in English), *British Journal of Rheumatology*, Article vol. 33, no. 6, pp. 569–575, 1994. [Online]. Available: <https://www.embase.com/search/results?subaction=viewrecord&id=L24179263&from=export>. <https://doi.org/10.1093/rheumatology/33.6.569> PMID: 8205407
82. Ernst A. and Shelley-Tremblay J., "Non-ketogenic, low carbohydrate diet predicts lower affective distress, higher energy levels and decreased fibromyalgia symptoms in middle-aged females with fibromyalgia syndrome as compared to the western pattern diet," (in English), *Journal of Musculoskeletal Pain*, Article vol. 21, no. 4, pp. 365–370, 2013, <https://doi.org/10.3109/10582452.2013.852649>
83. Suzuki T. et al., "Japanese dietary pattern consistently relates to low depressive symptoms and it is modified by job strain and worksite supports," (in eng), *J Affect Disord*, vol. 150, no. 2, pp. 490–8, Sep 5 2013, <https://doi.org/10.1016/j.jad.2013.04.044> Epub 2013 Jun 4. PMID: 23759276
84. Kakoschke N. et al., "Effects of very low-carbohydrate vs. high-carbohydrate weight loss diets on psychological health in adults with obesity and type 2 diabetes: a 2-year randomized controlled trial," (in eng), *Eur J Nutr*, vol. 60, no. 8, pp. 4251–4262, Dec 2021, <https://doi.org/10.1007/s00394-021-02587-z> Epub 2021 May 20. PMID: 34018052
85. Daneshzad E., Keshavarz S. A., Qorbani M., Larijani B., and Azadbakht L., "Association between a low-carbohydrate diet and sleep status, depression, anxiety, and stress score," (in eng), *J Sci Food Agric*, vol. 100, no. 7, pp. 2946–2952, May 2020, <https://doi.org/10.1002/jsfa.10322> Epub 2020 Feb 24. PMID: 32031258
86. Ebrahimpour-Koujan S., Keshteli A. H., Afshar H., Esmailzadeh A., and Adibi P., "Adherence to low carbohydrate diet and prevalence of psychological disorders in adults," (in eng), *Nutr J*, vol. 18, no. 1, p. 87, Dec 23 2019, <https://doi.org/10.1186/s12937-019-0513-8> PMID: 31870446
87. Brinkworth G. D. et al., "Long-term effects of very low-carbohydrate and high-carbohydrate weight-loss diets on psychological health in obese adults with type 2 diabetes: randomized controlled trial," (in eng), *J Intern Med*, vol. 280, no. 4, pp. 388–97, Oct 2016, <https://doi.org/10.1111/joim.12501> Epub 2016 Mar 23. PMID: 27010424
88. Sangsefidi Z. S., Salehi-Abarghouei A., Sangsefidi Z. S., Mirzaei M., and Hosseinzadeh M., "The relation between low carbohydrate diet score and psychological disorders among Iranian adults," (in



- English), *Nutrition and Metabolism*, Article vol. 18, no. 1, 2021, <https://doi.org/10.1186/s12986-021-00546-3> PMID: 33516257
89. Davis N. J., Tomuta N., Isasi C. R., Leung V., and Wylie-Rosett J., "Diabetes-specific quality of life after a low-carbohydrate and low-fat dietary intervention," (in eng), *Diabetes Educ*, vol. 38, no. 2, pp. 250–5, Mar-Apr 2012, <https://doi.org/10.1177/01457217111436132> Epub 2012 Feb 7. PMID: 22316641
  90. Brinkworth G. D., Buckley J. D., Noakes M., Clifton P. M., and Wilson C. J., "Long-term effects of a very low-carbohydrate diet and a low-fat diet on mood and cognitive function," (in eng), *Arch Intern Med*, vol. 169, no. 20, pp. 1873–80, Nov 9 2009, <https://doi.org/10.1001/archinternmed.2009.329> PMID: 19901139
  91. Chan D., Skidmore P., O'Brien L., Watson S., and Geary R., "A feasibility study investigating the impact of a dietitian-led low in fermentable oligosaccharide, disaccharide, monosaccharide and polyols diet group education programme with irritable bowel syndrome," (in eng), *N Z Med J*, vol. 133, no. 1522, pp. 42–51, Sep 25 2020. PMID: 32994615
  92. O'Brien L. et al., "A Low FODMAP Diet Is Nutritionally Adequate and Therapeutically Efficacious in Community Dwelling Older Adults with Chronic Diarrhoea," (in eng), *Nutrients*, vol. 12, no. 10, Sep 30 2020, <https://doi.org/10.3390/nu12103002> PMID: 33007886
  93. Kortlever T. L. et al., "Low-FODMAP Diet Is Associated With Improved Quality of Life in IBS Patients —A Prospective Observational Study," (in English), *Nutrition in Clinical Practice*, Article vol. 34, no. 4, pp. 623–630, 2019, <https://doi.org/10.1002/ncp.10233> PMID: 30644587
  94. Eswaran S., Chey W. D., Jackson K., Pillai S., Chey S. W., and Han-Markey T., "A Diet Low in Fermentable Oligo-, Di-, and Monosaccharides and Polyols Improves Quality of Life and Reduces Activity Impairment in Patients With Irritable Bowel Syndrome and Diarrhea," (in eng), *Clin Gastroenterol Hepatol*, vol. 15, no. 12, pp. 1890–1899.e3, Dec 2017, <https://doi.org/10.1016/j.cgh.2017.06.044> Epub 2017 Jun 28. PMID: 28668539
  95. Peters S. L., Yao C. K., Philpott H., Yelland G. W., Muir J. G., and Gibson P. R., "Randomised clinical trial: the efficacy of gut-directed hypnotherapy is similar to that of the low FODMAP diet for the treatment of irritable bowel syndrome," (in eng), *Aliment Pharmacol Ther*, vol. 44, no. 5, pp. 447–59, Sep 2016, <https://doi.org/10.1111/apt.13706> Epub 2016 Jul 11. PMID: 27397586
  96. Chan M. M. H., Zarate-Lopez N., and Martin L., "Group education on the low FODMAP diet improves gastrointestinal symptoms but neither anxiety or depression in irritable bowel syndrome," (in English), *Journal of human nutrition and dietetics: the official journal of the British Dietetic Association*, Article in Press 2021, <https://doi.org/10.1111/jhn.12951> PMID: 34705305
  97. Luong T. C. et al., "Fear, anxiety and depression among pregnant women during COVID-19 pandemic: impacts of healthy eating behaviour and health literacy," (in eng), *Ann Med*, vol. 53, no. 1, pp. 2120–2131, Dec 2021, <https://doi.org/10.1080/07853890.2021.2001044> PMID: 34761972
  98. Hosseinzadeh M. et al., "Psychological disorders and dietary patterns by reduced-rank regression," (in eng), *Eur J Clin Nutr*, vol. 73, no. 3, pp. 408–415, Mar 2019, <https://doi.org/10.1038/s41430-019-0399-8> Epub 2019 Jan 31. PMID: 30705385
  99. Vilela A. A. et al., "Association of Prepregnancy Dietary Patterns and Anxiety Symptoms from Mid-pregnancy to Early Postpartum in a Prospective Cohort of Brazilian Women," (in eng), *J Acad Nutr Diet*, vol. 115, no. 10, pp. 1626–35, Oct 2015, <https://doi.org/10.1016/j.jand.2015.01.007> Epub 2015 Mar 11. PMID: 25769749
  100. Rossa-Roccor V., Richardson C. G., Murphy R. A., and Gadermann A. M., "The association between diet and mental health and wellbeing in young adults within a biopsychosocial framework," (in eng), *PLoS One*, vol. 16, no. 6, p. e0252358, 2021, <https://doi.org/10.1371/journal.pone.0252358> eCollection 2021. PMID: 34081708
  101. Salehi-Abargouei A. et al., "Do patterns of nutrient intake predict self-reported anxiety, depression and psychological distress in adults? SEPAHAN study," (in eng), *Clin Nutr*, vol. 38, no. 2, pp. 940–947, Apr 2019, <https://doi.org/10.1016/j.clnu.2018.02.002> Epub 2018 Feb 21. PMID: 29503058
  102. Mousavi S. M., Ebrahimi-Mousavi S., Hassanzadeh Keshteli A., Afshar H., Esmailzadeh A., and Adibi P., "The association of plant-based dietary patterns and psychological disorders among Iranian adults," (in eng), *J Affect Disord*, vol. 300, pp. 314–321, Mar 1 2022, <https://doi.org/10.1016/j.jad.2022.01.028> Epub 2022 Jan 4. PMID: 34990626
  103. Zamani B., Daneshzad E., Siassi F., Guilani B., Bellissimo N., and Azadbakht L., "Association of plant-based dietary patterns with psychological profile and obesity in Iranian women," (in eng), *Clin Nutr*, vol. 39, no. 6, pp. 1799–1808, Jun 2020, <https://doi.org/10.1016/j.clnu.2019.07.019> Epub 2019 Jul 26. PMID: 31399262
  104. Daneshzad E., Keshavarz S. A., Qorbani M., Larijani B., Bellissimo N., and Azadbakht L., "Association of dietary acid load and plant-based diet index with sleep, stress, anxiety and depression in diabetic

- women," (in eng), *Br J Nutr*, vol. 123, no. 8, pp. 901–912, Apr 28 2020, <https://doi.org/10.1017/S0007114519003179> Epub 2019 Dec 6. PMID: 31806069
105. Noguchi R., Hiraoka M., Watanabe Y., and Kagawa Y., "Relationship between dietary patterns and depressive symptoms: difference by gender, and unipolar and bipolar depression," (in eng), *J Nutr Sci Vitaminol (Tokyo)*, vol. 59, no. 2, pp. 115–22, 2013, <https://doi.org/10.3177/jnsv.59.115> PMID: 23727641
  106. Yannakoulia M. et al., "Eating habits in relations to anxiety symptoms among apparently healthy adults. A pattern analysis from the ATTICA Study," (in eng), *Appetite*, vol. 51, no. 3, pp. 519–25, Nov 2008, <https://doi.org/10.1016/j.appet.2008.04.002> Epub 2008 Apr 8. PMID: 18495296
  107. Khanna P. and Aeri B. T., "Association of Quantity and Quality of Protein Intake with Depression and Anxiety Symptoms among Adolescent Boys and Girls (13–15 Years) Studying in Public Schools of Delhi," (in eng), *J Nutr Sci Vitaminol (Tokyo)*, vol. 66, no. Supplement, pp. S141–s148, 2020, <https://doi.org/10.3177/jnsv.66.S141> PMID: 33612584
  108. Kim J. Y., Kang H. L., Kim D. K., Kang S. W., and Park Y. K., "Eating Habits and Food Additive Intakes Are Associated with Emotional States Based on EEG and HRV in Healthy Korean Children and Adolescents," (in eng), *J Am Coll Nutr*, vol. 36, no. 5, pp. 335–341, Jul 2017, <https://doi.org/10.1080/07315724.2017.1281774> Epub 2017 May 26. PMID: 28548564
  109. Becsei D. et al., "Quality of life in children living with PKU—a single-center, cross-sectional, observational study from Hungary," (in English), *Molecular Genetics and Metabolism Reports*, Article vol. 29, 2021, <https://doi.org/10.1016/j.ymgmr.2021.100823> PMID: 34900594
  110. Alkhazrajy L. A., Abdulla R., and Baher H. H., "The association between quality of habitual diet and mental health status among iraqi women attending primary health care centers," (in English), *Archivos Venezolanos de Farmacología y Terapéutica*, Article vol. 39, no. 5, pp. 604–609, 2020. [Online]. Available: <https://www.embase.com/search/results?subaction=viewrecord&id=L2005445070&from=export>.
  111. Sangsefidi Z. S., Mirzaei M., and Hosseinzadeh M., "The relation between dietary intakes and psychological disorders in Iranian adults: a population-based study," (in eng), *BMC Psychiatry*, vol. 20, no. 1, p. 257, May 24 2020, <https://doi.org/10.1186/s12888-020-02678-x> PMID: 32448207
  112. Du C., Hsiao P. Y., Ludy M. J., and Tucker R. M., "Relationships between Dairy and Calcium Intake and Mental Health Measures of Higher Education Students in the United States: Outcomes from Moderation Analyses," (in eng), *Nutrients*, vol. 14, no. 4, Feb 12 2022, <https://doi.org/10.3390/nu14040775> PMID: 35215428
  113. Alkhatatbeh M. J., Khwaileh H. N., and Abdul-Razzak K. K., "High prevalence of low dairy calcium intake and association with insomnia, anxiety, depression and musculoskeletal pain in university students from Jordan," (in eng), *Public Health Nutr*, vol. 24, no. 7, pp. 1778–1786, May 2021, <https://doi.org/10.1017/S1368980020002888> Epub 2020 Aug 24. PMID: 32830623
  114. Ghodsi R., Rostami H., Parastouei K., and Taghdir M., "Associations between whole and low-fat dairy products consumption, physical performance and mental health," (in English), *Mediterranean Journal of Nutrition and Metabolism*, Article vol. 14, no. 2, pp. 127–136, 2021, <https://doi.org/10.3233/MNM-200474>
  115. Rintamäki R. et al., "Difference in diet between a general population national representative sample and individuals with alcohol use disorders, but not individuals with depressive or anxiety disorders," (in eng), *Nord J Psychiatry*, vol. 68, no. 6, pp. 391–400, Aug 2014, <https://doi.org/10.3109/08039488.2013.851736> Epub 2013 Dec 9. PMID: 24320018
  116. Satija A., Yu E., Willett W. C., and Hu F. B., "Understanding nutritional epidemiology and its role in policy," (in eng), *Adv Nutr*, vol. 6, no. 1, pp. 5–18, Jan 2015, <https://doi.org/10.3945/an.114.007492> PMID: 25593140
  117. National Dairy Council. "13 ways milk can help your body." <https://www.usdairy.com/getmedia/0caf28ce-c6ce-4be0-adfd-dbc208f942a3/13-nutrients-in-milk-infographic-2021.pdf> (accessed).
  118. Li J. et al., "Zinc Intakes and Health Outcomes: An Umbrella Review," (in eng), *Front Nutr*, vol. 9, p. 798078, 2022, <https://doi.org/10.3389/fnut.2022.798078> PMID: 35211497
  119. Silva M. R. M. et al., "Relationship between vitamin D deficiency and psychophysiological variables: a systematic review of the literature," (in eng), *Clinics (Sao Paulo)*, vol. 76, p. e3155, 2021, <https://doi.org/10.6061/clinics/2021/e3155> PMID: 34755759
  120. Marx W. et al., "Diet and depression: exploring the biological mechanisms of action," (in eng), *Mol Psychiatry*, vol. 26, no. 1, pp. 134–150, Jan 2021, <https://doi.org/10.1038/s41380-020-00925-x> PMID: 33144709
